# Supplementary material
Source: PubMed Central journal article supplement (PMC8522506)
Supplement: NIHMS1742321-supplement-Supp1.pdf [file NIHMS1742321-supplement-Supp1.pdf]

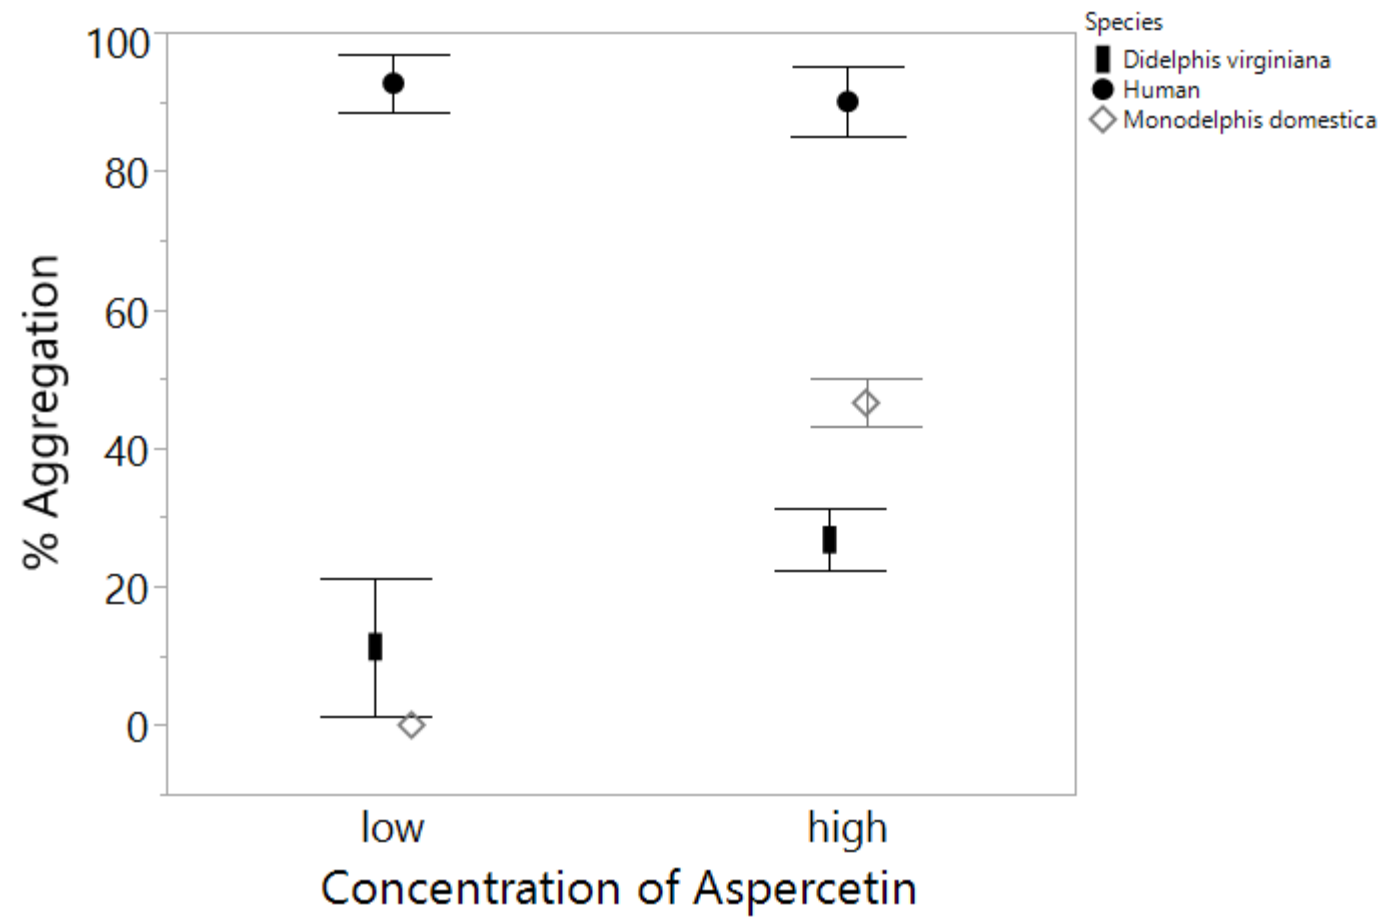

**Supplementary Figure 1.** *Monodelphis domestica* percent aggregation response to asperctin. *Monodelphis domestica* samples from failed ADP control for high and low concentrations of asperctin. Grey diamonds are *Monodelphis domestica*, black rectangles are *Didelphis virginiana*, and black circles are Human. All tests are in PRP, and error bars are the standard error of the mean (%Transmittance as %Aggregation). All samples of *M. domestica* are from an individual who failed to aggregate in response to ADP. *M. domestica* samples contained botrocein which failed to aggregate platelets, after which asperctin was added to the same samples and results above were recorded.
